# Supplementary material for: Molten salt electrolytes for electrochemical capacitors with energy densities exceeding 50 W h kg−1
Source: Royal Society of Chemistry journal article supplement (doi:10.1039/d2ee01969h), 2022-01-01
Supplement: d2ee01969h1.pdf [file d2ee01969h1.pdf]

**Electronic supplementary information for**

## **Molten salt electrolyte for electrochemical capacitor with energy density exceeding 50 W h/kg**

Kuangyu Wang,<sup>‡a</sup> Ziyao Chen,<sup>‡a</sup> Kai Liu,<sup>\*b</sup> Cheng Yang,<sup>c</sup> Haitian Zhang,<sup>d</sup> Yulong Wu,<sup>a</sup> Yuanzheng Long,<sup>a</sup> Hanlin Liu,<sup>a</sup> Yang Jin,<sup>e</sup> Meicheng Li,<sup>b</sup> Hui Wu<sup>\*a</sup>

<sup>a</sup> State Key Lab of New Ceramics and Fine Processing, School of Materials Science and Engineering, Tsinghua University, Beijing 100084, P. R. China

<sup>b</sup> State Key Laboratory of Alternate Electrical Power System with Renewable Energy Sources, School of New Energy, North China Electric Power University, Beijing 102206, P. R. China

<sup>c</sup> Center for Advanced Mechanics and Materials Applied Mechanics Laboratory, Department of Engineering Mechanics, Tsinghua University, Beijing 100084, P. R. China

<sup>d</sup> Institute of Nuclear and New Energy Technology, Tsinghua University, Beijing 100084, P. R. China

<sup>e</sup> Research Center of Grid Energy Storage and Battery Application, School of Electrical Engineering, Zhengzhou University, Zhengzhou 450001, P. R. China

\* Email: [huiwu@tsinghua.edu.cn](mailto:huiwu@tsinghua.edu.cn) (H.W.); [liukai21@ncepu.edu.cn](mailto:liukai21@ncepu.edu.cn) (K.L.).

‡ These authors contributed equally to this work.

## 1. Computational Details

### (1) MD simulations

The empirical force field parameters for all ions were described by the OPLS-AA format and were taken from the previous work<sup>1</sup>. Other small molecules were first optimized at the B3LYP/def2tzvp level by Gaussian 16 software to obtain a reasonable structure. The force field parameters were referred to the Ligpargen website (<http://zarbi.chem.yale.edu/ligpargen/>)<sup>2-4</sup>.

The modeling system of the bulk AlCl<sub>3</sub>-NaCl-LiCl system consisted of 200 LiCl, 200 NaCl, and 600 AlCl<sub>3</sub> salt ions, leading to a simulation box with a dimension of 5.15\*5.15\*5.15 nm<sup>3</sup>.

In the modeling system of the graphene slit pore, each pore wall was modeled as three sheets of graphene (5.15770\*5.10480 nm) separated by a distance  $\Delta = 0.3$  nm and fixed in space. The pore width H was defined as the minimum surface-to-surface distance between the two groups of graphene sheets in the z-direction. The carbon atoms in the graphene sheets were modeled as Lennard-Jones particles with  $\sigma = 0.350$  nm and  $\varepsilon = 0.334$  K J mol<sup>-1</sup>. Moreover, the graphene sheets were kept fixed during all simulations.

In order to study the structure and ion dynamics of the nanoconfined AlCl<sub>3</sub>-NaCl-LiCl, we initially included a suitable number of ions inside the slit pores. All the systems had a density of  $\sim 1.22$  g cm<sup>-3</sup>, which was similar to the bulk density of the molten salt at 398.15 K.

Atomistic simulations were performed using GROMACS 2020.6 package<sup>5-7</sup>. Packing Optimization for Molecular Dynamics Simulations (Packmol) program was used for building initial configurations of the bulk system for molecular dynamics simulations<sup>8</sup>.

The simulation process was detailed as follows. The 5000-step steepest descent method and 5000-step conjugate gradient method were used to avoid unreasonable contact in the system. NPT ensemble was used to pre-equilibrate the system, and V-rescale

temperature coupling and Parrinello-Rahman pressure coupling were used to control the temperature to 398.15 K, and the pressure was maintained at 1 atm. The non-bonding cutoff radius was 1.2 nm, and the integration step was 2 fs. The bond length and angle were constrained by the LINCS algorithm. The two-way intercept was set to 1.2 nm, van der Waals interaction, and the long-distance electrostatic interaction was set by the particle-mesh Ewald method. The trajectory file during the simulation was saved every 10.0 ps.

## (2) DFT simulations

All calculations were performed using the plane wave based periodic DFT method as implemented in the Vienna Ab Initio Simulation Package (VASP)<sup>9,10</sup>. The electron-ion interaction was described with the projector augmented wave (PAW) method<sup>11,12</sup>. The electron exchange and correlation energies were treated within the generalized gradient approximation in the Perdew-Burke-Ernzerhof functional (GGA-PBE)<sup>13</sup>. The plane wave basis was set up to 520 eV. Computations were satisfied until the energy and force converged within  $10^{-6}$  eV and  $0.02 \text{ eV \AA}^{-1}$ , respectively. A  $6*8*1$  supercell of 96 carbon atoms is constructed for the intercalation of  $\text{AlCl}_4^-$ .

To binding energy is calculated as following<sup>14</sup>:

$$E_{\text{binding}} = E_{[\text{AlCl}_4]_x\text{C}_n} - E_{\text{C}_n} - xE_{\text{AlCl}_4}$$

where  $E_{[\text{AlCl}_4]_x\text{C}_n}$ ,  $E_{\text{C}_n}$ , and  $E_{\text{AlCl}_4}$  are the total energy of intercalated graphene, bulk graphene, and  $\text{AlCl}_4$ .

The intercalation potential is calculated as following<sup>14</sup>:

$$V = \frac{\left( \frac{3}{x} E_{[\text{AlCl}_4]_x\text{C}_n} + 4E_{[M^+ \text{AlCl}_4^-]} + E_{\text{Al}} \right) - \left( \frac{3}{x} E_{\text{C}_n} + 4E_{[M^+ \text{Al}_2\text{Cl}_7^-]} \right)}{z}$$

where  $z$  is the number of electrons transferred per formula unit,  $x$  is the number of  $\text{AlCl}_4$  molecules intercalated.  $E_{\text{Al}}$  is the total energy of a single Al atom in a bulk fcc structure.

$E_{[M^+AlCl_4^-]}$  is the average of the total energy of  $Li^+AlCl_4^-$  and  $Na^+AlCl_4^-$ , and

$E_{[M^+Al_2Cl_7^-]}$  is the average of the total energy of  $Li^+Al_2Cl_7^-$  and  $Na^+Al_2Cl_7^-$ .

## 2. Supplementary Figures

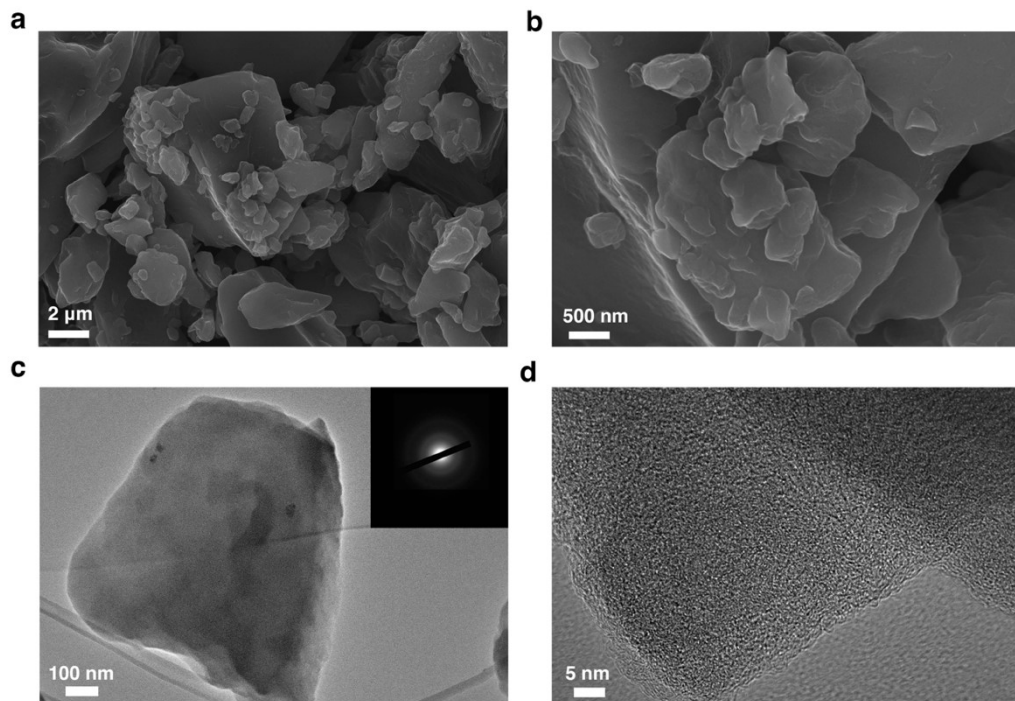

**Fig. S1** (a), (b) SEM and (c), (d) TEM images of the AC powders.

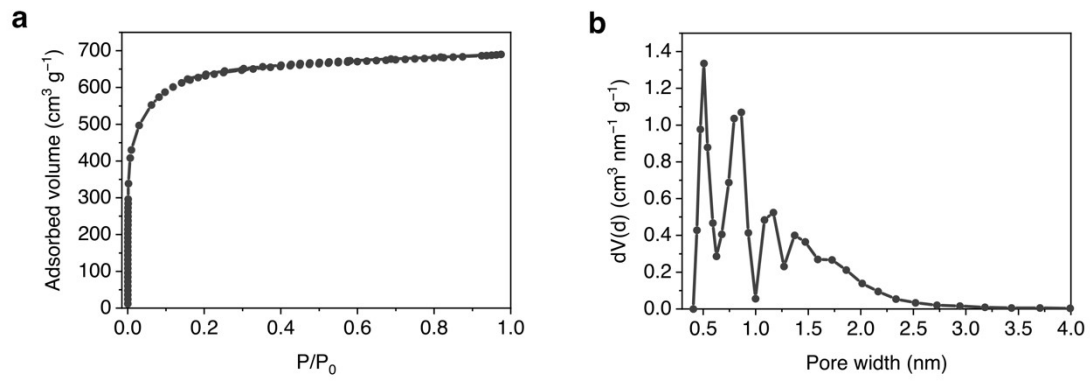

**Fig. S2** (a) Argon adsorption-desorption isotherms and (b) pore size distributions of the AC powders.

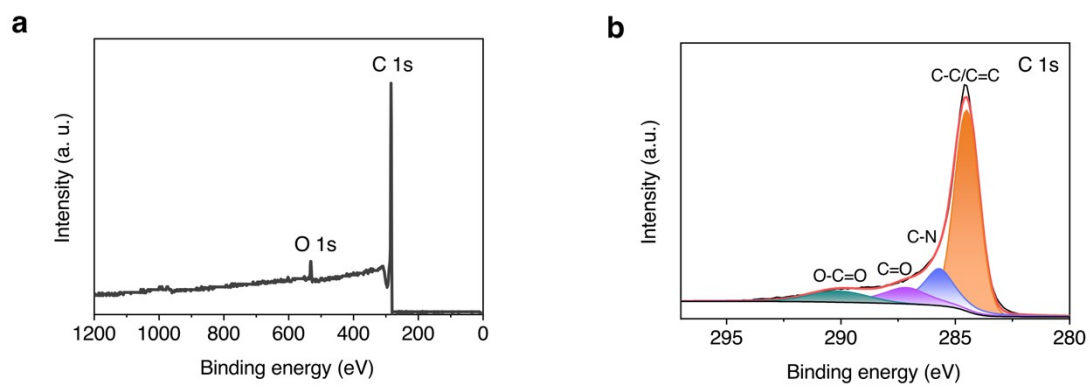

**Fig. S3** XPS spectra of the AC powders.

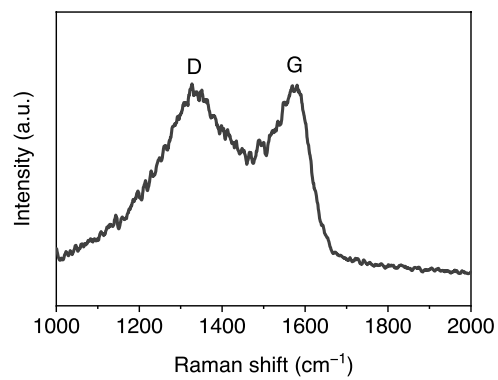

**Fig. S4** Raman spectrum of the AC powders.



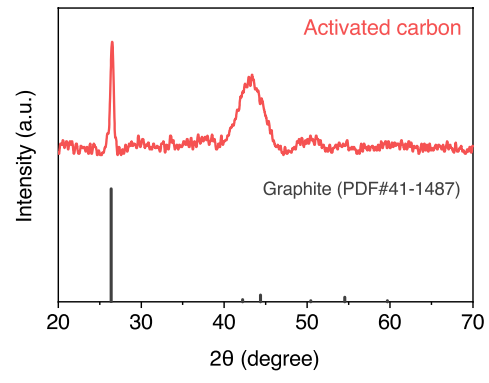

**Fig. S5** XRD pattern of the AC powders.

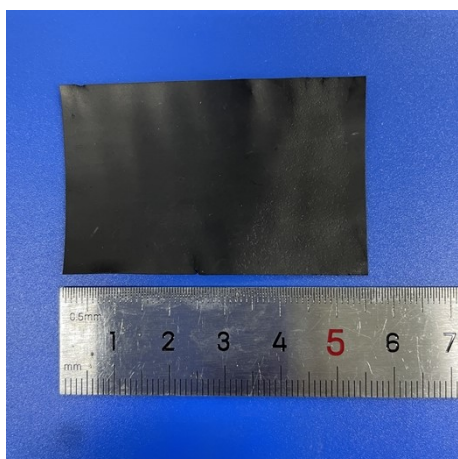

**Fig. S6** Digital photo of the AC electrode.

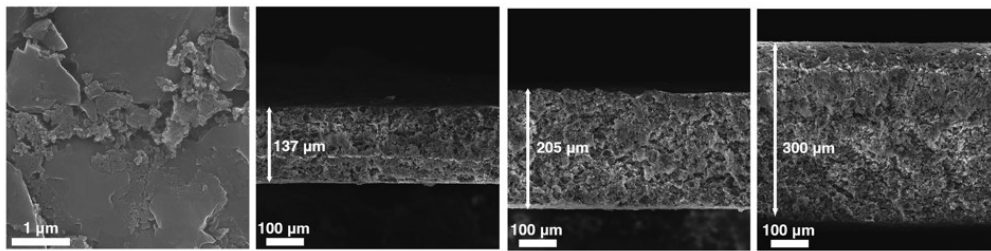

**Fig. S7** SEM images of the surface and cross-sections of the AC electrodes with different thicknesses.

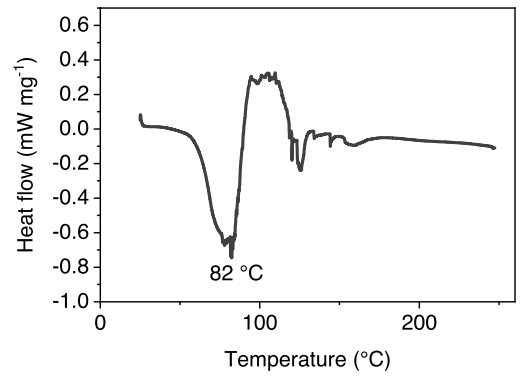

**Fig. S8** DSC curve of the AlCl<sub>3</sub>-NaCl-LiCl electrolyte.

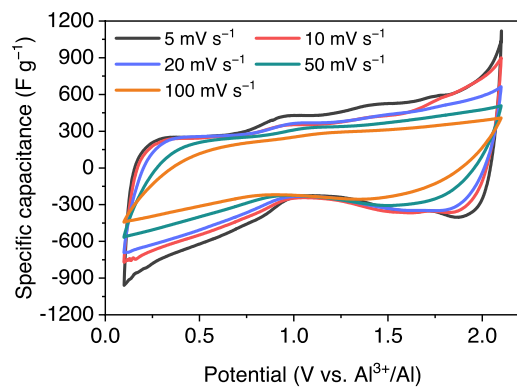

**Fig. S9** CV curves of the AC electrode in the AlCl<sub>3</sub>-NaCl-LiCl electrolyte at 125 °C and different scan rates.

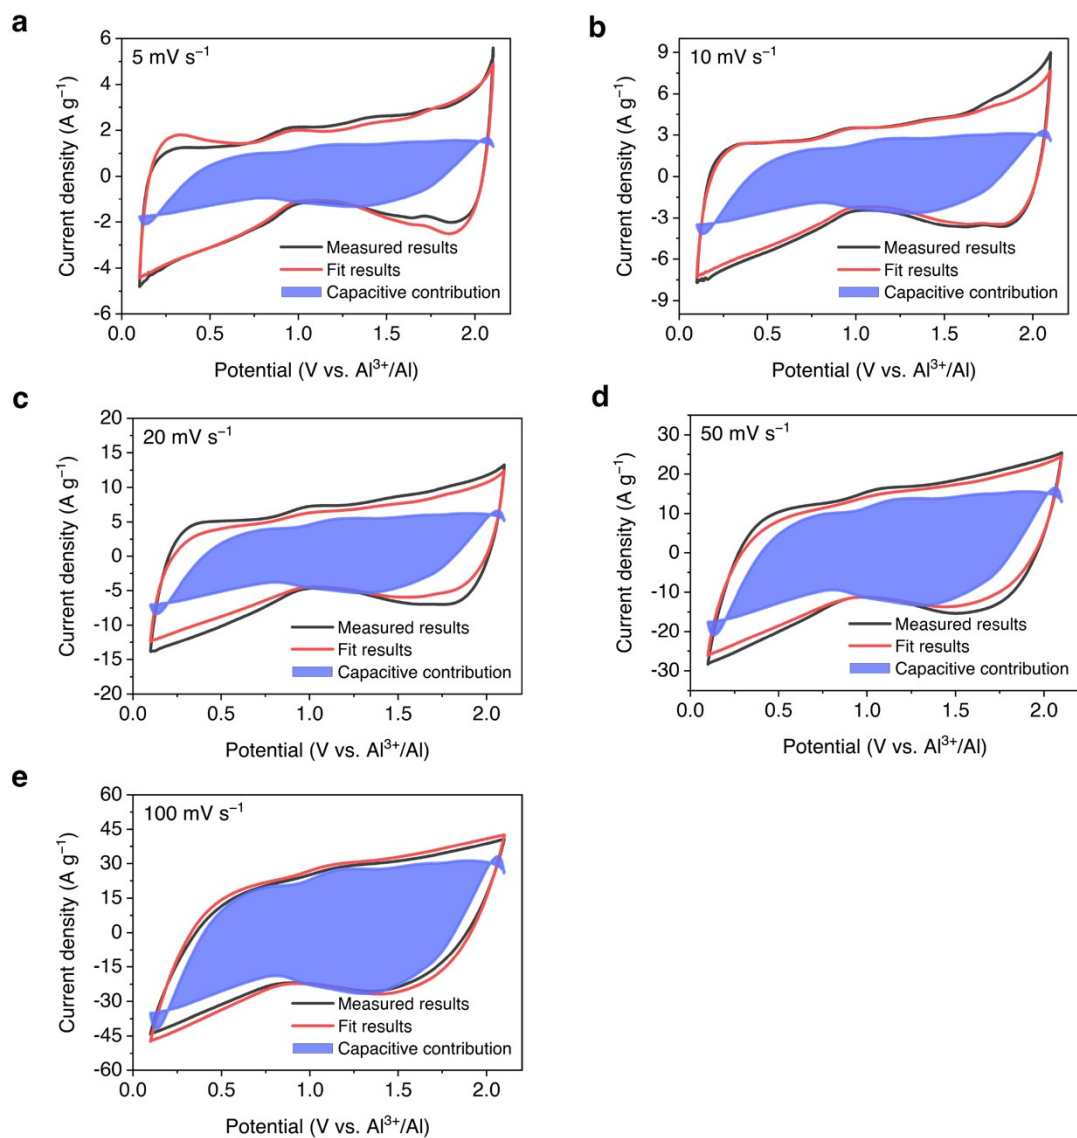

**Fig. S10** CV curves of the AC electrode with experimental and fitted results at scan rates of (a) 5 mV s<sup>-1</sup>, (b) 10 mV s<sup>-1</sup>, (c) 20 mV s<sup>-1</sup>, (d) 50 mV s<sup>-1</sup>, and (e) 100 mV s<sup>-1</sup>. The blue areas represented the capacitive contributions.

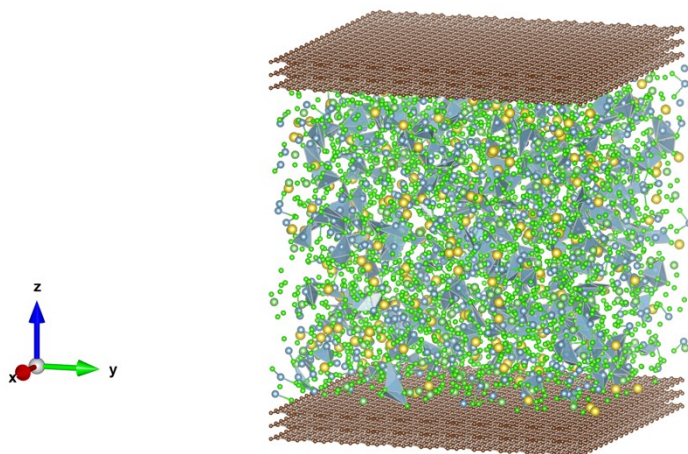

**Fig. S11** Representative simulation snapshot of the  $\text{AlCl}_3$ - $\text{NaCl}$ - $\text{LiCl}$  system confined in the graphene slit pore with a width of 5.00 nm at 125 °C calculated by MD simulations.

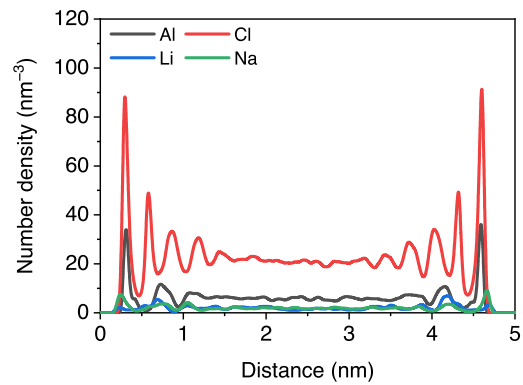

**Fig. S12** Number density profiles along the z-direction of the ions of the AlCl<sub>3</sub>-NaCl-LiCl system confined in the graphene slit pore with a width of 5.00 nm at 125 °C calculated by MD simulations.



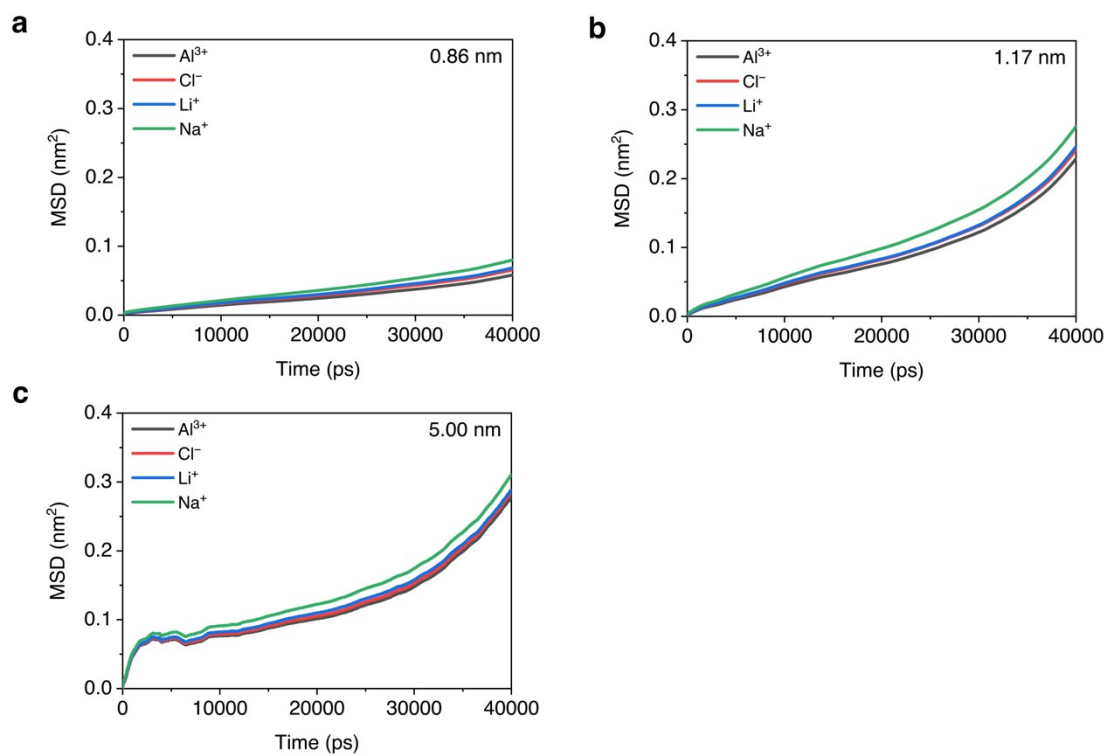

**Fig. S13** MSDs of the ions of the  $\text{AlCl}_3$ - $\text{NaCl}$ - $\text{LiCl}$  system confined in graphene slit pores with widths of (a) 0.86 nm, (b) 1.17 nm, and (c) 5.00 nm at 125 °C calculated by MD simulations.

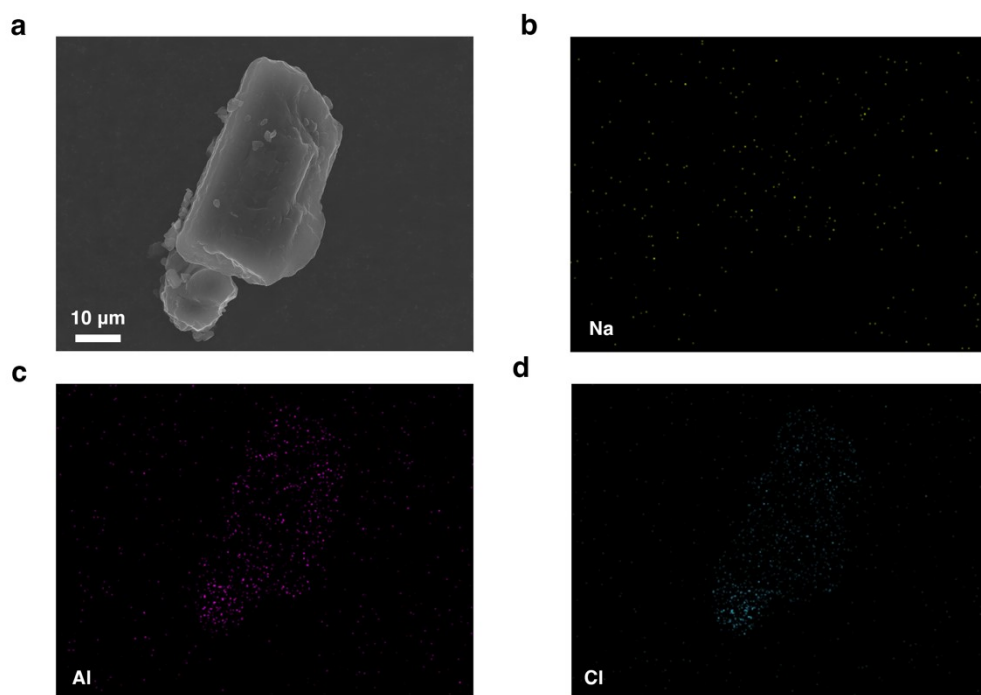

**Fig. S14** (a) SEM image and corresponding EDX mappings of (b) Na, (c) Al, and (d) Cl of the MS@AC powders.

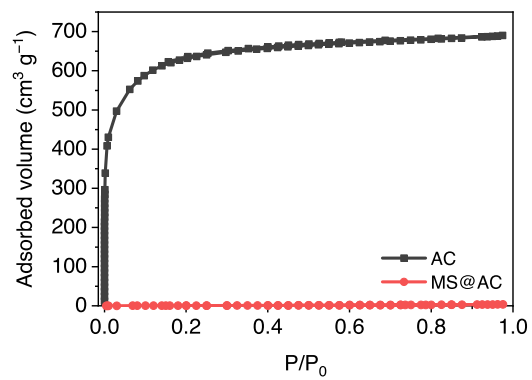

**Fig. S15** Argon adsorption-desorption isotherms of the AC and MS@AC powders.

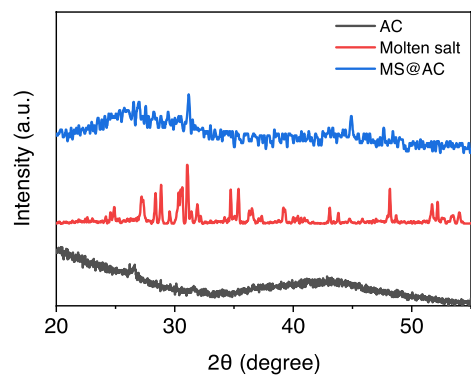

**Fig. S16** XRD patterns of the AC, molten salt, and MS@AC powders.

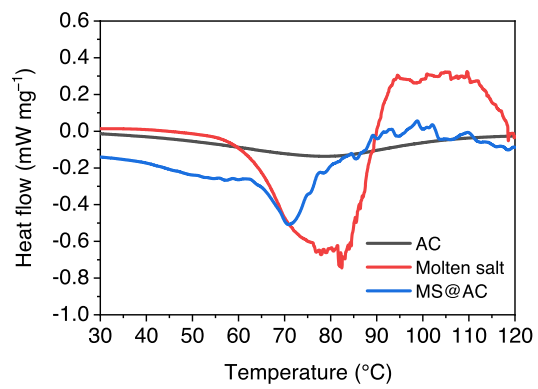

**Fig. S17** DSC curves of the AC, molten salt, and MS@AC powders.

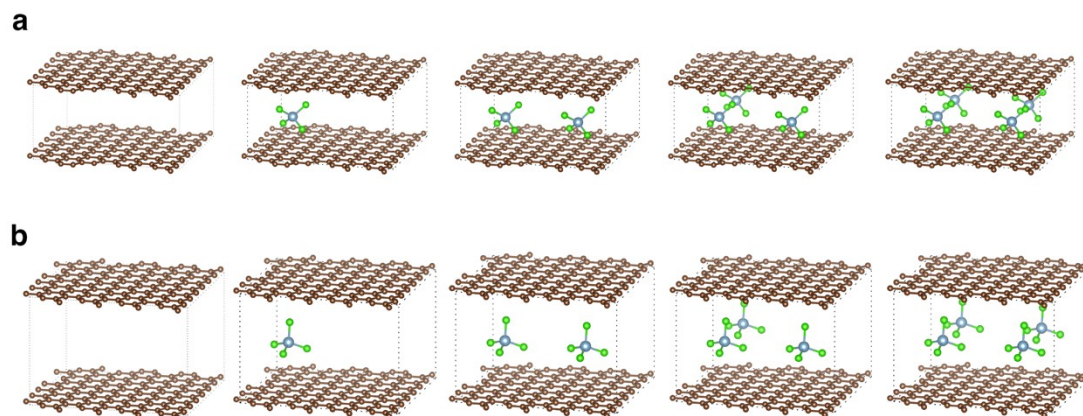

**Fig. S18** Schematic representations of the optimized structures of the graphene slit pores with widths of (a) 0.86 nm and (b) 1.17 nm with 0, 1, 2, 3, 4 intercalated AlCl<sub>4</sub>.

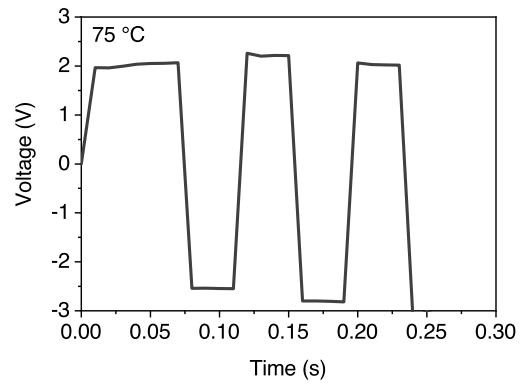

**Fig. S19** GCD curve of the MS-EC cycled at 75 °C and a current density of 1 A g<sup>-1</sup>.

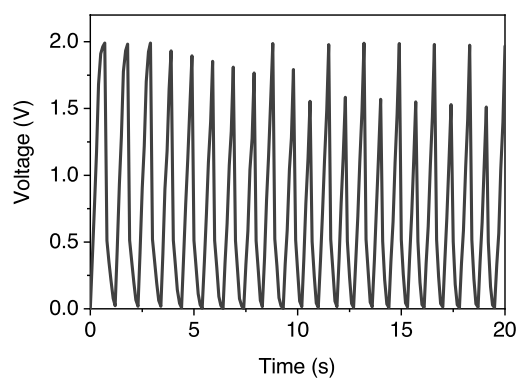

**Fig. S20** Side reactions test. Two bare Mo meshes were applied as electrodes, and the device was cycled at 125 °C and a current density of 1 mA cm<sup>-1</sup>.



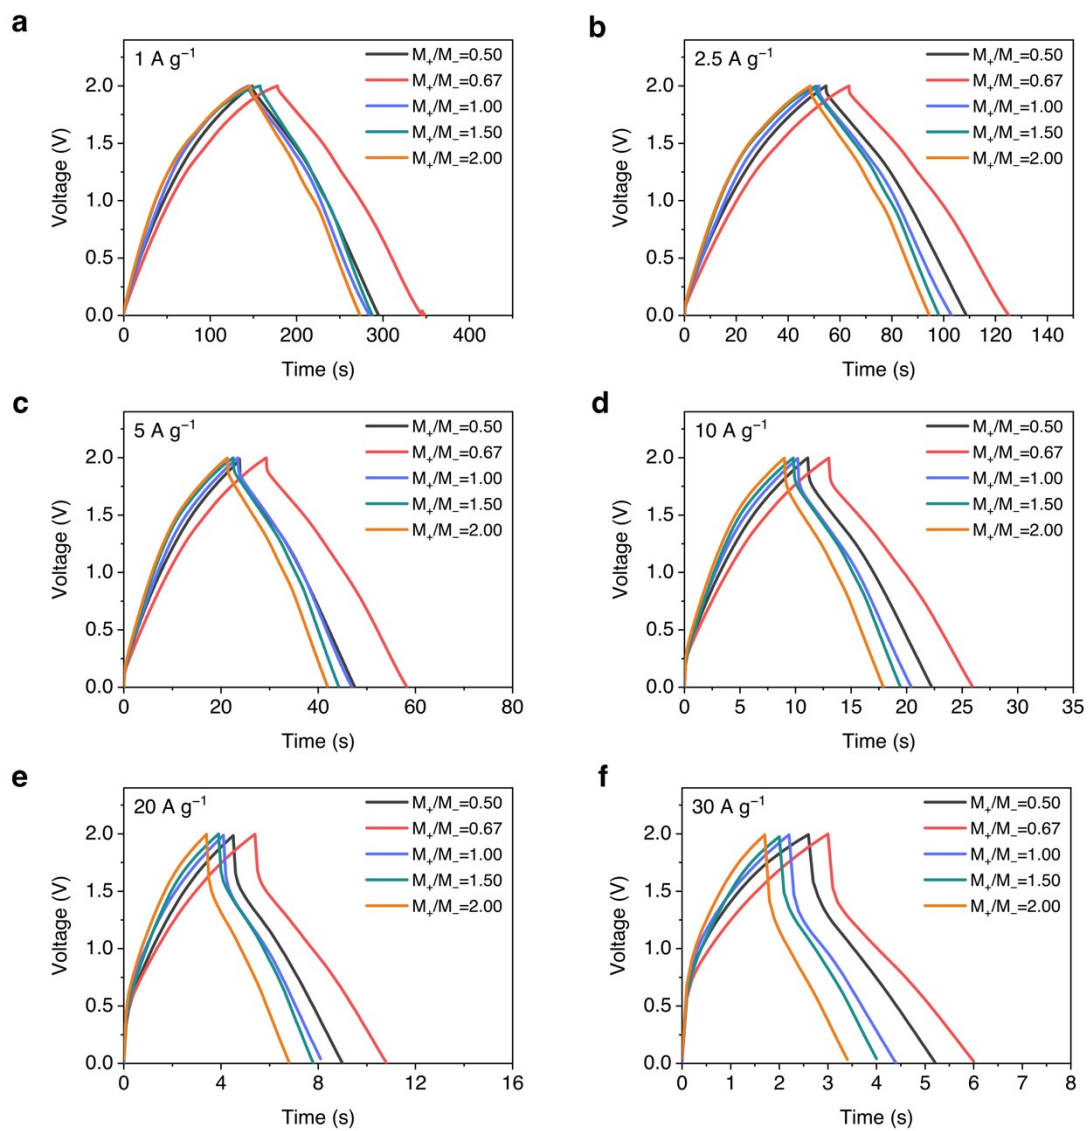

**Fig. S21** GCD curves of MS-ECs with different  $M_+/M_-$  values at  $125 \text{ }^\circ\text{C}$  and current densities of (a)  $1 \text{ A g}^{-1}$ , (b)  $2.5 \text{ A g}^{-1}$ , (c)  $5 \text{ A g}^{-1}$ , (d)  $10 \text{ A g}^{-1}$ , (e)  $20 \text{ A g}^{-1}$ , and (f)  $30 \text{ A g}^{-1}$ .

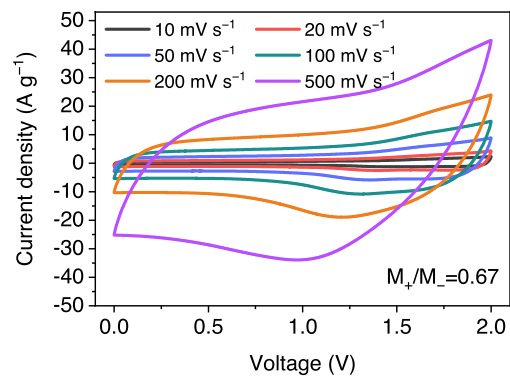

**Fig. S22** CV curves of the MS-EC with an  $M_+/M_-$  value of 0.67 at 125 °C and different scan rates.

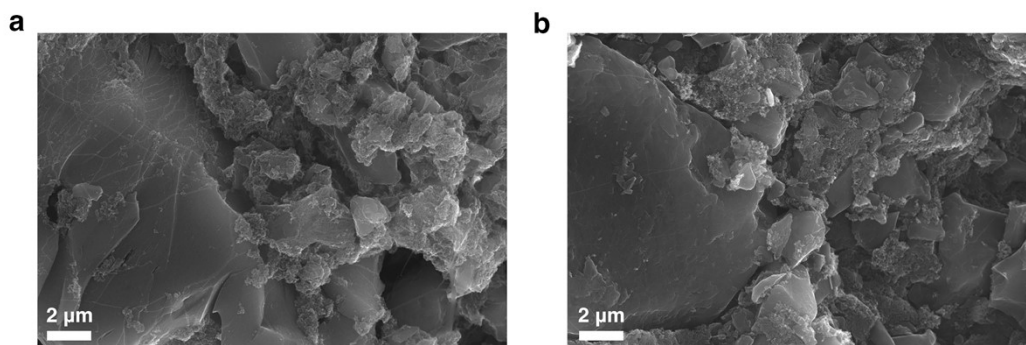

**Fig. S23** SEM images of the electrodes (a) in the pristine state and (b) after cycling.

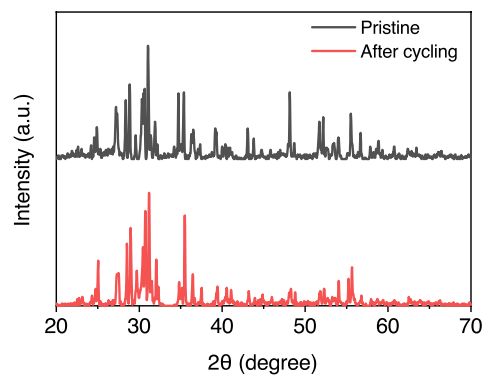

**Fig. S24** XRD patterns of the  $\text{AlCl}_3\text{-NaCl-LiCl}$  electrolyte in the pristine state and after cycling.

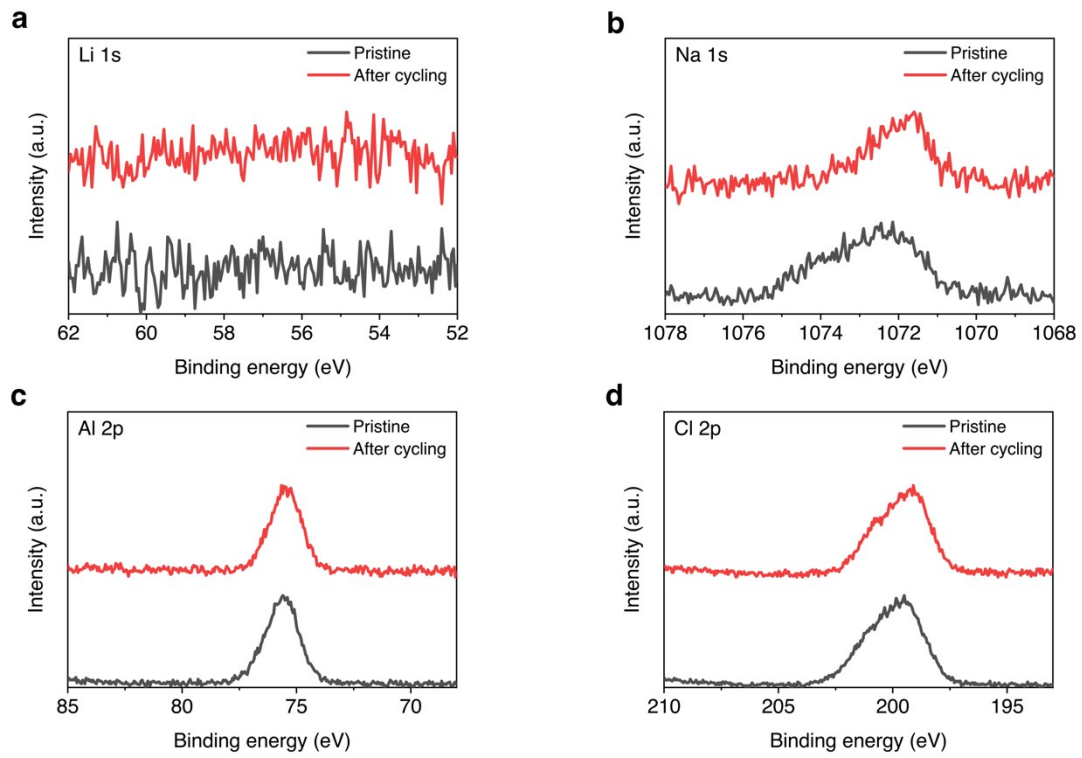

**Fig. S25** XPS curves of (a) Li 1s, (b) Na 1s, (c) Al 2p, and (d) Cl 2p of the  $\text{AlCl}_3$ -NaCl-LiCl electrolyte in the pristine state and after cycling.

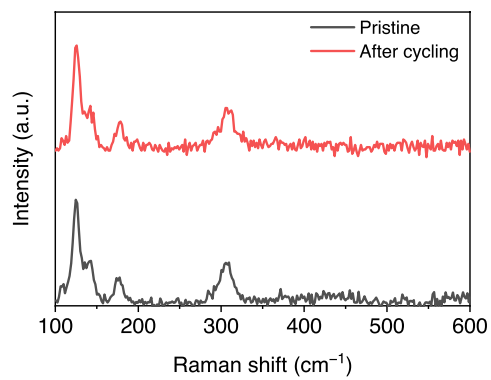

**Fig. S26** Raman spectra of the AlCl<sub>3</sub>-NaCl-LiCl electrolyte in the pristine state and after cycling.

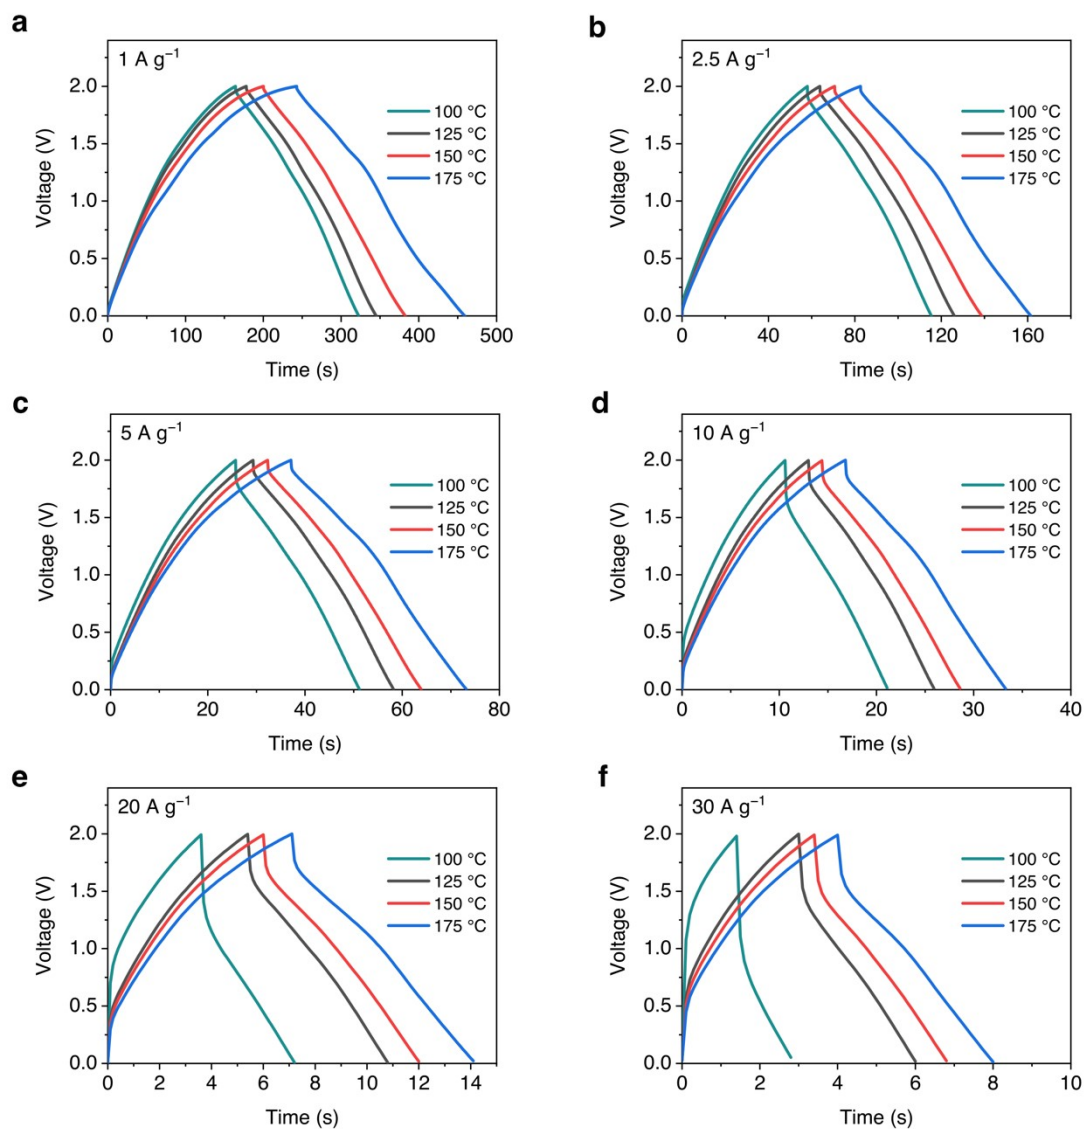

**Fig. S27** GCD curves of the MS-EC cycled at different temperatures and current densities of (a) 1 A g<sup>-1</sup>, (b) 2.5 A g<sup>-1</sup>, (c) 5 A g<sup>-1</sup>, (d) 10 A g<sup>-1</sup>, (e) 20 A g<sup>-1</sup>, and (f) 30 A g<sup>-1</sup>.

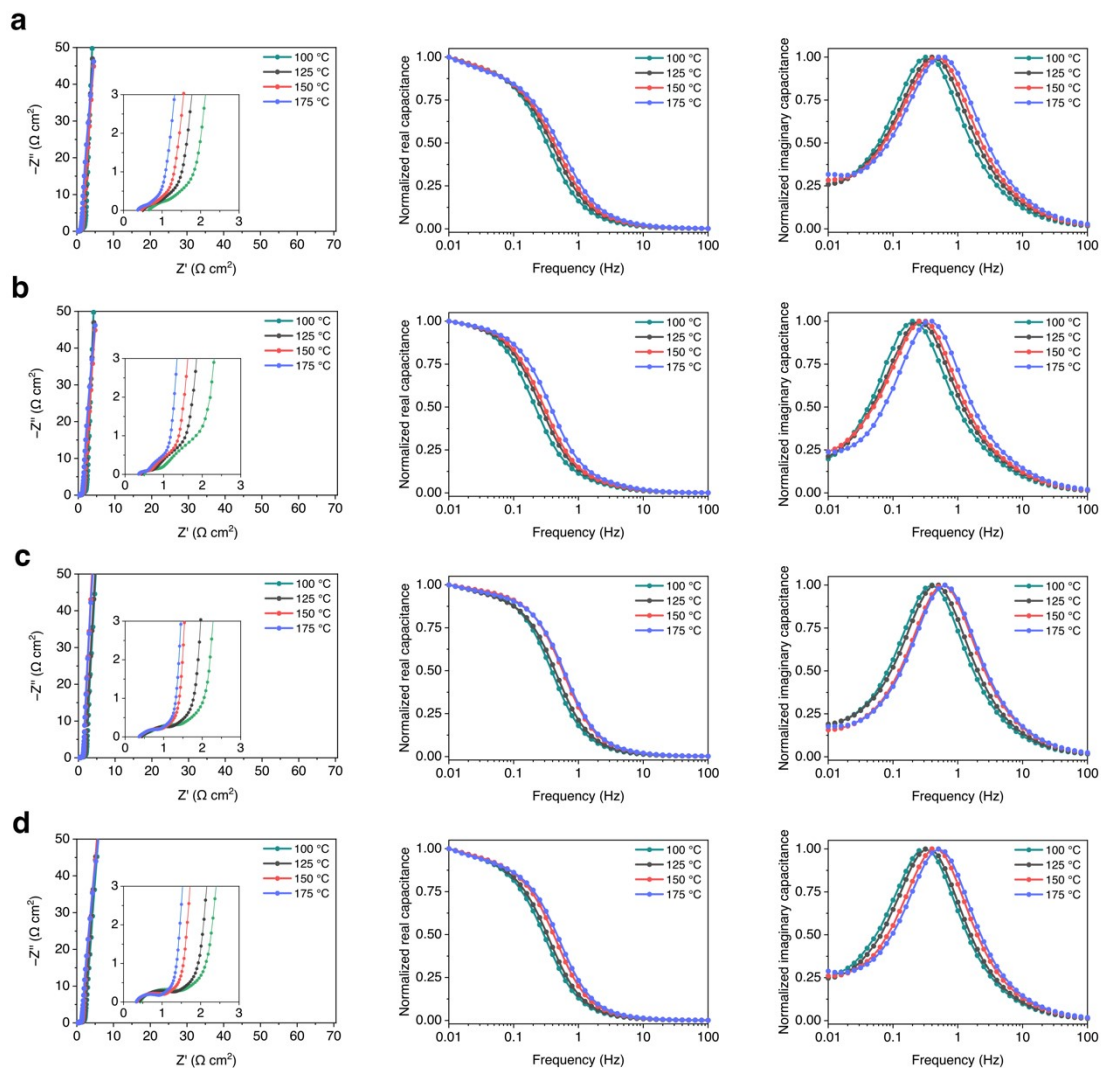

**Fig. S28 EIS measurements of four MS-ECs at different temperatures.** Nyquist plot, normalized real capacitance, and normalized imaginary capacitance of (a) Device #1, (b) Device #2, (c) Device #3, and (d) Device #4.



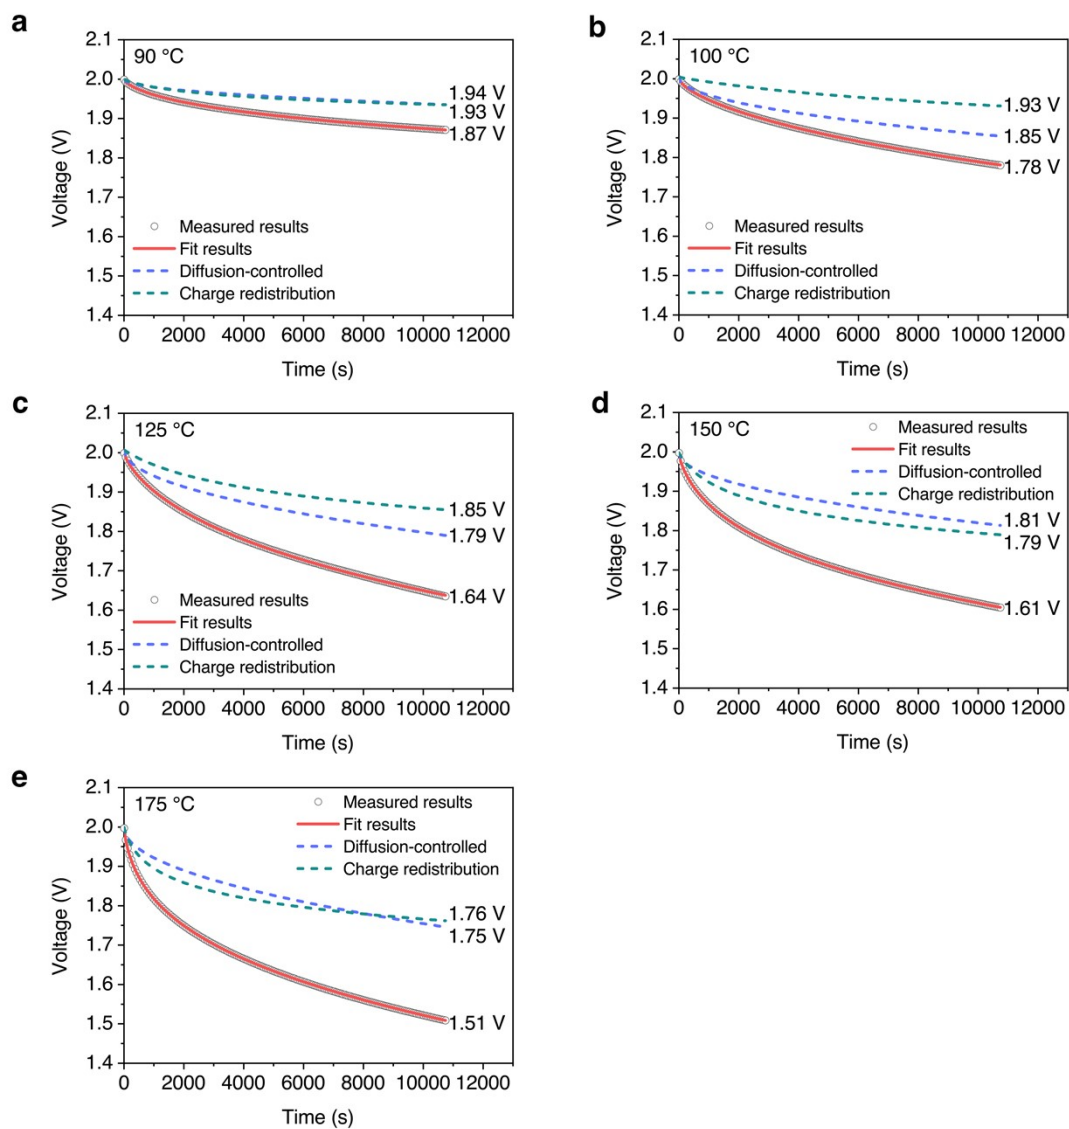

**Fig. S29** Self-discharge profiles of the MS-EC at (a) 90 °C, (b) 100 °C, (c) 125 °C, (d) 150 °C, and (e) 175 °C with experimental and fitted results.

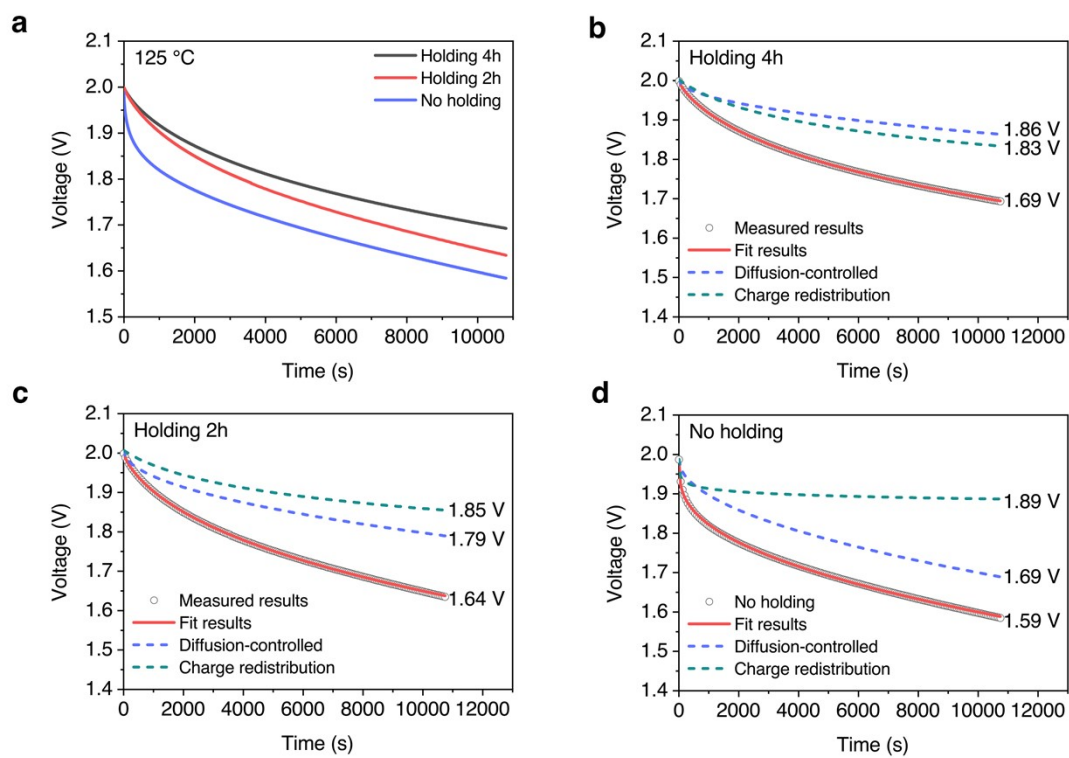

**Fig. S30** (a) Self-discharge profiles of the MS-EC after different holding time and (b)-(d) the corresponding fitted results.

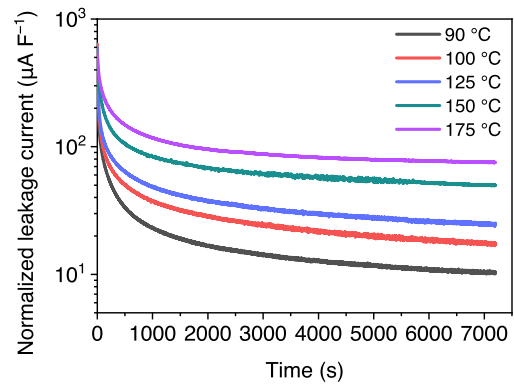

**Fig. S31** Leakage current profiles of the MS-EC at different temperatures.

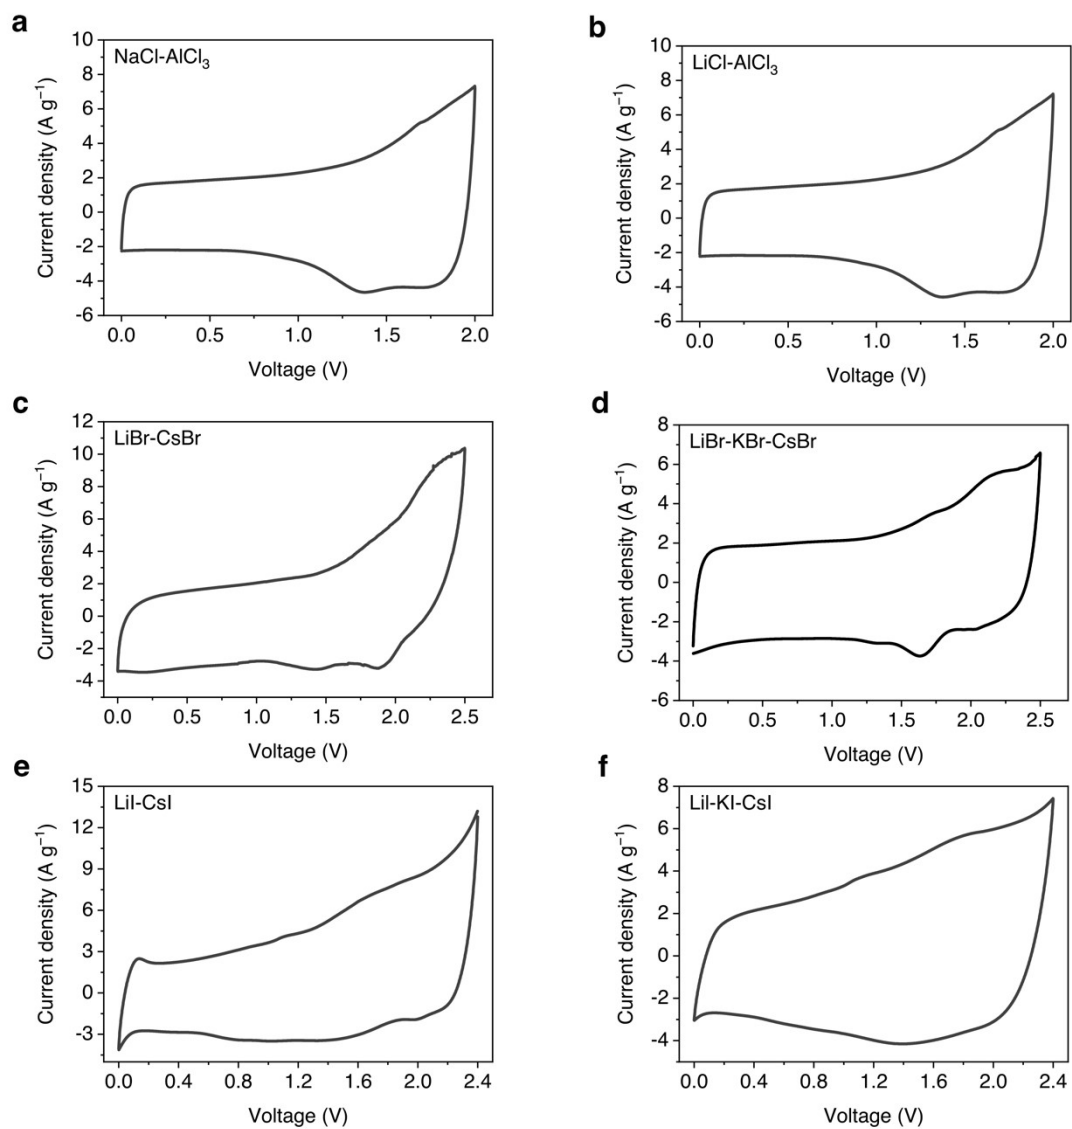

**Fig. S32** CV curves of the MS-ECs with AC electrodes based on the (a) NaCl-AlCl<sub>3</sub>, (b) LiCl-AlCl<sub>3</sub>, (c) LiBr-CsBr, (d) LiBr-KBr-CsBr, (e) LiI-CsI, and (f) LiI-KI-CsI electrolytes at a scan rate of 20 mV s<sup>-1</sup>.

### 3. Supplementary Tables

**Table S1** Electrode thicknesses of the MS-ECs with different  $M_+/M_-$  values.

| $M_+/M_-$ | Cathode thickness ( $\mu\text{m}$ ) | Anode thickness ( $\mu\text{m}$ ) |
|-----------|-------------------------------------|-----------------------------------|
| 0.50      | ~137                                | ~300                              |
| 0.67      | ~137                                | ~205                              |
| 1.00      | ~137                                | ~137                              |
| 1.50      | ~205                                | ~137                              |
| 2.00      | ~300                                | ~137                              |

**Table S2** Element contents of the AlCl<sub>3</sub>-NaCl-LiCl electrolyte in the pristine state and after cycling based on the ICP-OES analysis.

| Element Content<br>(wt%) | Li   | Na   | Al    |
|--------------------------|------|------|-------|
| Pristine                 | 1.61 | 4.53 | 15.59 |
| After cycling            | 1.75 | 4.74 | 15.96 |

a) Based on the results above, it can be calculated that the molar ratios of LiCl, NaCl, and AlCl<sub>3</sub> of the AlCl<sub>3</sub>-NaCl-LiCl electrolyte in the pristine state and after cycling were 0.23:0.20:0.57 and 0.24:0.20:0.56, respectively.

**Table S3** Performance metrics of the MS-ECs from the EIS measurements.

|           | Temperature<br>(°C) | ESR ( $\Omega$<br>cm <sup>2</sup> ) | R <sub>int</sub> ( $\Omega$<br>cm <sup>2</sup> ) | Peak<br>Frequency<br>(Hz) | Relaxation<br>time constant<br>(s) |
|-----------|---------------------|-------------------------------------|--------------------------------------------------|---------------------------|------------------------------------|
| Device #1 | 100                 | 0.60                                | 1.32                                             | 0.32                      | 3.16                               |
|           | 125                 | 0.46                                | 1.10                                             | 0.40                      | 2.51                               |
|           | 150                 | 0.42                                | 0.92                                             | 0.50                      | 2.00                               |
|           | 175                 | 0.33                                | 0.75                                             | 0.50                      | 2.00                               |
| Device #2 | 100                 | 0.37                                | 2.00                                             | 0.20                      | 5.00                               |
|           | 125                 | 0.34                                | 1.50                                             | 0.25                      | 4.00                               |
|           | 150                 | 0.32                                | 1.24                                             | 0.32                      | 3.13                               |
|           | 175                 | 0.30                                | 1.05                                             | 0.40                      | 2.50                               |
| Device #3 | 100                 | 0.37                                | 1.23                                             | 0.40                      | 2.51                               |
|           | 125                 | 0.36                                | 1.08                                             | 0.50                      | 2.00                               |
|           | 150                 | 0.32                                | 0.83                                             | 0.63                      | 1.58                               |
|           | 175                 | 0.32                                | 0.78                                             | 0.63                      | 1.58                               |
| Device #4 | 100                 | 0.33                                | 1.14                                             | 0.40                      | 2.51                               |
|           | 125                 | 0.29                                | 1.03                                             | 0.40                      | 2.51                               |
|           | 150                 | 0.27                                | 0.80                                             | 0.63                      | 1.58                               |
|           | 175                 | 0.27                                | 0.73                                             | 0.63                      | 1.58                               |

**Table S4** Consumed energy in the heating process of the MS-ECs.

|                           | Stored energy<br>(Wh kg <sup>-1</sup> ) | Consumed energy (Wh kg <sup>-1</sup> ) |                           |                           |
|---------------------------|-----------------------------------------|----------------------------------------|---------------------------|---------------------------|
|                           |                                         | Condition 1 <sup>d)</sup>              | Condition 2 <sup>e)</sup> | Condition 3 <sup>f)</sup> |
| Electrolyte <sup>a)</sup> | 134.0                                   | 2.1                                    | 11.2                      | 21.5                      |
| Electrode <sup>b)</sup>   | 50.0                                    | 1.9                                    | 4.9                       | 14.6                      |
| Device <sup>c)</sup>      | 36.4                                    | 2.0                                    | 9.5                       | 19.6                      |

<sup>a)</sup> The heat capacity of the AlCl<sub>3</sub>-NaCl-LiCl electrolyte is estimated to be 0.7 J g<sup>-1</sup> K<sup>-1</sup> according to reference<sup>15</sup>. The fusion enthalpy of the AlCl<sub>3</sub>-NaCl-LiCl electrolyte is calculated to be 21.9 J g<sup>-1</sup> from Fig. S8.

<sup>b)</sup> The heat capacity of the AC electrode is estimated to be 0.7 J g<sup>-1</sup> K<sup>-1</sup> according to reference<sup>16</sup>.

<sup>c)</sup> The stored and consumed energy are calculated based on the masses of the electrolyte and the AC in the electrodes.

<sup>d)</sup> In condition 1, the device is cooled down to 90 °C, where the electrolyte is in the liquid state, and then heated to 100 °C.

<sup>f)</sup> In condition 2, the device is cooled down to 75 °C, where the electrolyte is in the solid state, and then heated to 100 °C.

<sup>d)</sup> In condition 3, the device is cooled down to room temperature (25 °C) and then heated to 100 °C.



**Table S5** Comparisons of the EC systems with AC electrodes based on the AlCl<sub>3</sub>-NaCl-LiCl molten salt electrolyte and other electrolytes.

|                            | Energy density<br>(electrode) (Wh<br>kg <sup>-1</sup> ) <sup>e)</sup> | Energy density<br>(electrolyte)<br>(Wh kg <sup>-1</sup> ) <sup>f)</sup> | Ionic<br>conductivity<br>(mS cm <sup>-1</sup> ) | Price<br>(\$ kWh <sup>-1</sup> ) <sup>g)</sup> | Safety hazard                         |
|----------------------------|-----------------------------------------------------------------------|-------------------------------------------------------------------------|-------------------------------------------------|------------------------------------------------|---------------------------------------|
| Aqueous <sup>a)</sup>      | 7–15                                                                  | 15–80                                                                   | 500–800                                         | 1–4                                            | Corrosiveness                         |
| Organic <sup>b)</sup>      | 20–25                                                                 | 10–20                                                                   | 5–50                                            | 100–300                                        | Flammability,<br>volatility, toxicity |
| Ionic liquid <sup>c)</sup> | 25–35                                                                 | 40–80                                                                   | 1–20                                            | 1000–3000                                      | /                                     |
| Molten salt <sup>d)</sup>  | 35–50                                                                 | 107                                                                     | 100–300                                         | 28                                             | High temperature                      |

a) The parameters of the ECs with aqueous electrolytes are calculated based on references<sup>17–20</sup>.

b) The parameters of the ECs with organic electrolytes are calculated based on references<sup>20–22</sup>.

c) The parameters of the ECs with ionic liquid electrolytes are calculated based on references<sup>21–24</sup>.

d) The parameters of the ECs with molten salt are calculated based on the experimental results of the MS-ECs with the AlCl<sub>3</sub>-NaCl-LiCl electrolyte.

e) The energy densities based on the active material mass in the electrodes correspond to the data with power densities of ~ 1 kW kg<sup>-1</sup>.

f) The energy densities based on the electrolyte mass are calculated based on the following equation<sup>21</sup>.

$$E_{\text{electrolyte}} = \frac{1}{2} \alpha n m_0 F U$$

where  $E_{\text{electrolyte}}$  is the energy density of an EC calculated based on the electrolyte mass,  $\alpha$  represents the fraction of total salt removed from the bulk electrolyte upon complete charging,  $n$  refers to the charge number of the adsorbed ion,  $m_0$  is the initial salt molality

in the electrolyte,  $F$  is Faraday's constant, and  $U$  is the operative voltage. In approximation,  $\alpha$  is assumed to be 1.0 for aqueous electrolytes and 0.5 for the organic and ionic liquid electrolytes according to reference<sup>21</sup>. For the  $\text{AlCl}_3$ - $\text{NaCl}$ - $\text{LiCl}$  electrolyte, the molar ratio of  $\text{Na}^+$ ,  $\text{Li}^+$ ,  $\text{AlCl}_4^-$ , and  $\text{Al}_2\text{Cl}_7^-$  is estimated to be 1:1:1:1 according to reference<sup>25</sup>.

g) The prices of the raw materials are obtained from [www.alibaba.com](http://www.alibaba.com).

**Table S6** Melting points and electrochemical windows of salt mixtures consisting of different anions.

| Anions                                                                                                                  | Melting point<br>(°C) | Electrochemical window                            |                                                   |
|-------------------------------------------------------------------------------------------------------------------------|-----------------------|---------------------------------------------------|---------------------------------------------------|
|                                                                                                                         |                       | Cathodic limit                                    | Anodic limit                                      |
| Fluoride (F <sup>-</sup> ) <sup>26-28</sup>                                                                             | ~480–700              | N/A                                               | ~5.0 V vs. Li <sup>+</sup> /Li                    |
| Chloride (Cl <sup>-</sup> ) <sup>29</sup>                                                                               | ~265–350              | N/A                                               | ~3.7 V vs. Li <sup>+</sup> /Li                    |
| Bromine (Br <sup>-</sup> ) <sup>28,30</sup>                                                                             | ~220–300              | N/A                                               | ~3.2 V vs. Li <sup>+</sup> /Li                    |
| Iodine (I <sup>-</sup> ) <sup>31-33</sup>                                                                               | ~200–300              | N/A                                               | ~2.5 V vs. Li <sup>+</sup> /Li                    |
| Chloroaluminate (AlCl <sub>4</sub> <sup>-</sup> ,<br>Al <sub>2</sub> Cl <sub>7</sub> <sup>-</sup> , etc.) <sup>34</sup> | ~75–180               | ~0 V vs. Al <sup>3+</sup> /Al                     | ~2.2 V vs. Al <sup>3+</sup> /Al                   |
| Hydroxide (OH <sup>-</sup> ) <sup>35,36</sup>                                                                           | ~150–200              | ~-2.3 V vs. Ag <sup>+</sup> /Ag                   | ~-0.2 V vs. Ag <sup>+</sup> /Ag                   |
| Nitrate (NO <sub>3</sub> <sup>-</sup> ) <sup>37-40</sup>                                                                | ~80–230               | ~2.2 V vs. Li <sup>+</sup> /Li                    | ~3.8 V vs. Li <sup>+</sup> /Li                    |
| Carbonate (CO <sub>3</sub> <sup>2-</sup> ) <sup>41-43</sup>                                                             | ~490–710              | ~-2.0 V vs.<br>Ag/Ag <sub>2</sub> SO <sub>4</sub> | ~-0.4 V vs.<br>Ag/Ag <sub>2</sub> SO <sub>4</sub> |

## References

- 1 S. V. Sambasivarao and O. Acevedo, *J. Chem. Theory Comput.*, 2009, **5**, 1038–1050.
- 2 W. L. Jorgensen and J. Tirado-Rives, *Proc. Natl. Acad. Sci. U. S. A.*, 2005, **102**, 6665–6670.
- 3 L. S. Dodda, J. Z. Vilseck, J. Tirado-Rives and W. L. Jorgensen, *J. Phys. Chem. B*, 2017, **121**, 3864–3870.
- 4 L. S. Dodda, I. C. De Vaca, J. Tirado-Rives and W. L. Jorgensen, *Nucleic Acids Res.*, 2017, **45**, W331–W336.
- 5 J. Fu, X. Ji, J. Chen, L. Chen, X. Fan, D. Mu and C. Wang, *Angew. Chemie*, 2020, **132**, 22378–22385.
- 6 H. Yang, X. Chen, N. Yao, N. Piao, Z. Wang, K. He, H. M. Cheng and F. Li, *ACS Energy Lett.*, 2021, **6**, 1413–1421.
- 7 N. N. Rajput, J. Monk, R. Singh and F. R. Hung, *J. Phys. Chem. C*, 2012, **116**, 5169–5181.
- 8 L. Martínez, R. Andrade, E. G. Birgin and J. M. Martínez, *J. Comput. Chem.*, 2009, **30**, 2157–2164.
- 9 G. Kresse and J. Furthmüller, *Comput. Mater. Sci.*, 1996, **6**, 15–50.
- 10 G. Kresse and J. Furthmüller, *Phys. Rev. B - Condens. Matter Mater. Phys.*, 1996, **54**, 11169–11186.
- 11 P. E. Blöchl, *Phys. Rev. B*, 1994, **50**, 17953–17979.
- 12 D. Joubert, *Phys. Rev. B - Condens. Matter Mater. Phys.*, 1999, **59**, 1758–1775.
- 13 J. P. Perdew, K. Burke and M. Ernzerhof, *Phys. Rev. Lett.*, 1996, **77**, 3865–3868.
- 14 P. Bhauriyal, A. Mahata and B. Pathak, *Phys. Chem. Chem. Phys.*, 2017, **19**, 7980–7989.
- 15 C. Robelin, P. Chartrand and A. D. Pelton, *J. Chem. Thermodyn.*, 2004, **36**, 683–699.
- 16 N. Querejeta, S. García, N. Álvarez-Gutiérrez, F. Rubiera and C. Pevida, *J. CO<sub>2</sub> Util.*, 2019, **33**, 148–156.
- 17 X. Sun, X. Zhang, H. Zhang, D. Zhang and Y. Ma, *J. Solid State Electrochem.*,

- 2012, **16**, 2597–2603.
- 18 Z. Sun, M. Zheng, H. Hu, H. Dong, Y. Liang, Y. Xiao, B. Lei and Y. Liu, *Chem. Eng. J.*, 2018, **336**, 550–561.
- 19 Z. Qiu, Y. Wang, X. Bi, T. Zhou, J. Zhou, J. Zhao, Z. Miao, W. Yi, P. Fu and S. Zhuo, *J. Power Sources*, 2018, **376**, 82–90.
- 20 C. Zhong, Y. Deng, W. Hu, J. Qiao, L. Zhang and J. Zhang, *Chem. Soc. Rev.*, 2015, **44**, 7484–7539.
- 21 A. Brandt and A. Balducci, *J. Power Sources*, 2014, **250**, 343–351.
- 22 E. Mourad, L. Coustan, P. Lannelongue, D. Zigah, A. Mehdi, A. Vioux, S. A. Freunberger, F. Favier and O. Fontaine, *Nat. Mater.*, 2017, **16**, 446–454.
- 23 Q. D. Nguyen, J. Patra, C. Te Hsieh, J. Li, Q. F. Dong and J. K. Chang, *ChemSusChem*, 2019, **12**, 449–456.
- 24 F. Béguin, V. Presser, A. Balducci and E. Frackowiak, *Adv. Mater.*, 2014, **26**, 2219–2251.
- 25 A. A. Fannin, L. A. King and D. W. Seegmiller, *J. Electrochem. Soc.*, 1972, **119**, 801.
- 26 K. Lipkina, K. Palinka, E. Geiger, B. W. N. Fitzpatrick, O. S. Vălu, O. Beneš and M. H. A. Piro, *J. Nucl. Mater.*, 2022, **568**, 153901.
- 27 L. Xu, Y. Xiao, Q. Xu, A. Van Sandwijk, J. Li, Z. Zhao, Q. Song and Y. Yang, *RSC Adv.*, 2016, **6**, 84472–84479.
- 28 A. Abbasalizadeh, A. Malfliet, S. Seetharaman, J. Sietsma and Y. Yang, *J. Sustain. Metall.*, 2017, **3**, 627–637.
- 29 T. Murakami, T. Nohira, Y. H. Ogata and Y. Ito, *Electrochem. Solid-State Lett.*, 2005, **8**, 8–11.
- 30 T. Kasajima, T. Nishikiori, T. Nohira and Y. Ito, *J. Electrochem. Soc.*, 2004, **151**, 335–339.
- 31 Q. Gong, W. Ding, A. Bonk, H. Li, K. Wang, A. Jianu, A. Weisenburger, A. Bund and T. Bauer, *J. Power Sources*, 2020, **475**, 228674.
- 32 K. Kumamoto, A. Kishimoto and T. Uda, *J. Appl. Electrochem.*, 2020, **50**, 1209–1216.

- 33 H. Yu, H. Lu, X. Hu, J. Liu and Y. Cao, *Mater. Chem. Phys.*, 2020, **247**, 122865.
- 34 J. Tu, J. Wang, H. Zhu and S. Jiao, *J. Alloys Compd.*, 2020, **821**, 153285.
- 35 J. Yang, H. Muroyama, T. Matsui and K. Eguchi, *J. Power Sources*, 2014, **245**, 277–282.
- 36 M. H. Miles, *J. Appl. Electrochem.*, 2003, **33**, 1011–1016.
- 37 Y. Niu, Z. Wu and J. Du, *J. Electrochem. Soc.*, 2013, **160**, A1375–A1379.
- 38 M. Chen, Y. Shen, S. Zhu and P. Li, *Vacuum*, 2017, **145**, 225–233.
- 39 Z. Li and Z. G. Wu, *Sol. Energy Mater. Sol. Cells*, 2016, **155**, 341–347.
- 40 V. Giordani, D. Tozier, H. Tan, C. M. Burke, B. M. Gallant, J. Uddin, J. R. Greer, B. D. McCloskey, G. V. Chase and D. Addison, *J. Am. Chem. Soc.*, 2016, **138**, 2656–2663.
- 41 H. Yin, D. Tang, H. Zhu, Y. Zhang and D. Wang, *Electrochem. Commun.*, 2011, **13**, 1521–1524.
- 42 D. Tang, K. Zheng, H. Yin, X. Mao, D. R. Sadoway and D. Wang, *Electrochim. Acta*, 2018, **279**, 250–257.
- 43 T. Kojima, Y. Miyazaki, K. Nomura and K. Tanimoto, *J. Electrochem. Soc.*, 2008, **155**, F150.
